# Supplementary material for: The Chronic Care Model and Technological Research and Innovation: A Scoping Review at the Crossroads
Source: PubMed Central journal article supplement (PMC4342659; doi:10.2196/jmir.3547), 2015-02-06
Supplement: jmir_v17i2e25_app1.pdf [file jmir_v17i2e25_app1.pdf]

Multimedia Appendix 1.

| <b>Search words used</b>                                                 |
|--------------------------------------------------------------------------|
| "Chronic Care Model" and "Internet"                                      |
| "Chronic Care Model" and "telemedicine"                                  |
| "Chronic Care Model" and "information and communication technology"      |
| "Chronic Care Model" and "ICT"                                           |
| "Chronic Care Model" and "e-health"                                      |
| "Chronic Care Model" and "electronic health"                             |
| "Chronic Care Model" and "health informatics"                            |
| "Chronic Care Model" and "interactive health communication applications" |
